# Supplementary material
Source: HighWire-hosted journal article supplement (http://jpn.ca/highwire/filestream/89792/field_highwire_adjunct_files/0/jpn-110187-1-at.pdf)
Supplement: jpn-110187-1-at.pdf [file jpn-110187-1-at.pdf]

**Appendix 1** to Otti A, Guendel H, Henningsen P, et al. Functional network connectivity of pain-related resting state networks in somatoform pain disorder: an exploratory fMRI study. *J Psychiatry Neurosci* 2012.

DOI: 10.1503/jpn.110187

Copyright © 2012 The Author(s) or their employer(s). To receive this resource in an accessible format, please contact us at [cmajgroup@cmaj.ca](mailto:cmajgroup@cmaj.ca).

**Table S1: Brief Pain Inventory item scores for each patient\***

| Patient | BPI item |     |    |   |   |    |   |    |    |    |    |    |    |    |
|---------|----------|-----|----|---|---|----|---|----|----|----|----|----|----|----|
|         | 1        | 2   | 3  | 4 | 5 | 6  | 8 | 9A | 9B | 9C | 9D | 9E | 9F | 9G |
| 1       | Yes      | Yes | 5  | 5 | 5 | 2  | 3 | 4  | 5  | 4  | 3  | 7  | 6  | 8  |
| 2       | Yes      | Yes | 8  | 3 | 6 | 5  | 8 | 8  | 7  | 7  | 7  | 4  | 4  | 7  |
| 3       | Yes      | Yes | 8  | 7 | 7 | 8  | 7 | 8  | 9  | 6  | 7  | 7  | 10 | 9  |
| 4       | Yes      | Yes | 10 | 9 | 9 | 10 | 9 | 10 | 4  | 9  | 10 | 9  | 9  | 3  |
| 5       | Yes      | Yes | 9  | 4 | 5 | 6  | 5 | 7  | 7  | 0  | 7  | 3  | 1  | 4  |
| 6       | Yes      | Yes | 2  | 1 | 2 | 1  | — | 2  | 1  | 3  | 3  | 1  | 0  | 1  |
| 7       | Yes      | Yes | 4  | 0 | 2 | 1  | — | 3  | 1  | 2  | 3  | 1  | 2  | 1  |
| 8       | Yes      | Yes | —  | — | — | —  | — | —  | —  | —  | —  | —  | —  | —  |
| 9       | Yes      | Yes | 6  | 3 | 5 | 4  | 3 | 5  | 6  | 1  | 8  | 5  | 5  | 7  |
| 10      | Yes      | Yes | 10 | 7 | 9 | 9  | 0 | 9  | 9  | 10 | 1  | 5  | 9  | 7  |
| 11      | Yes      | Yes | 10 | 7 | 8 | 10 | 0 | 9  | 0  | 4  | 2  | 0  | 2  | 0  |
| 12      | Yes      | Yes | 7  | 5 | 6 | 8  | 5 | 4  | 2  | 1  | 4  | 0  | 6  | 1  |
| 13      | Yes      | Yes | 5  | 4 | 4 | 5  | 5 | 4  | 3  | 5  | 7  | 4  | 5  | 3  |
| 14      | Yes      | Yes | 8  | 6 | 8 | 8  | 7 | 8  | 9  | 8  | 8  | 6  | 8  | 8  |
| 15      | Yes      | Yes | —  | — | — | —  | — | —  | —  | —  | —  | —  | —  | —  |
| 16      | Yes      | Yes | 8  | 6 | 7 | 7  | — | 4  | 2  | 3  | 4  | 2  | 5  | 3  |
| 17      | Yes      | Yes | 5  | 1 | 3 | 3  | 9 | 3  | 5  | 3  | 6  | 5  | 5  | 6  |
| 18      | Yes      | Yes | 7  | 4 | 6 | 5  | 3 | 6  | 5  | 7  | 3  | 4  | 7  | 5  |
| 19      | Yes      | Yes | 5  | 0 | 4 | 3  | 5 | 2  | 3  | 2  | 4  | 1  | 0  | 3  |
| 20      | Yes      | Yes | 7  | 3 | 4 | 3  | 5 | 5  | 7  | 0  | 7  | 5  | 3  | 6  |
| 21      | Yes      | Yes | 9  | 5 | 7 | 7  | 2 | 8  | 7  | 7  | 8  | 7  | 6  | 7  |

BPI = Brief Pain Inventory (Radbruch L, Loick G, Kiencke P, et al. Validation of the German version of the Brief Pain Inventory. *J Pain Symptom Manage* 1999;18:180-7.)

\*Missing data are indicated with an em-dash. BPI items are as follows: 1 = pain within the last week, 2 = pain today, 3 = pain at its worst during the last week, 4 = pain at its least during the last week, 5 = pain on the average, 6 = pain right now, 8 = pain relief by therapy, 9A = impairment of general activity, 9B = impairment of mood, 9C = impairment of walking ability, 9D = impairment of normal work, 9E = impairment of relations with other people, 9F = impairment of sleep, 9G = impairment of enjoyment of life.
